# Supplementary material for: Loss of PRSS56 function leads to ocular angle defects and increased susceptibility to high intraocular pressure
Source: PubMed Central journal article supplement (PMC7272341; doi:10.1242/dmm.042853), 2020-05-29
Supplement: dmm-13-042853-s1.pdf [file dmm-13-042853-s1.pdf]

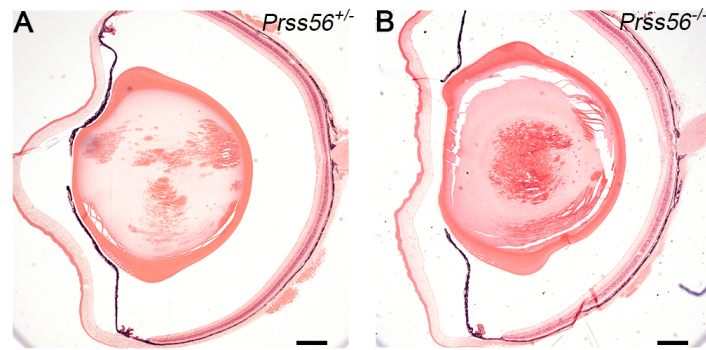

**Figure S1. Histological analysis of whole *Prss56*<sup>-/-</sup> and *Prss56*<sup>+/-</sup> control eyes.** (A-B) Representative H&E stained ocular sections from *Prss56*<sup>+/-</sup> (A) and *Prss56*<sup>-/-</sup> mice (B) showing that *Prss56*<sup>-/-</sup> eyes do not exhibit gross morphological abnormalities compared to control *Prss56*<sup>+/-</sup> eyes. Scale bars=250μm.

**Table S1. List of *PRSS56* variants identified in PCG cases and controls**

[Click here to download Table S1](#)

**Table S2. List of *PRSS56* variants identified in POAG cases and controls**

[Click here to download Table S2](#)

**Table S3. Clinical variables in PCG cases harboring *PRSS56* mutations**

[Click here to download Table S3](#)

**Table S4. List of primers used for sequencing *PRSS56* in patients and controls**

[Click here to download Table S4](#)
